# Supplementary material for: Structures of Gα Proteins in Complex with Their Chaperone Reveal Quality Control Mechanisms
Source: PubMed Central journal article supplement — Cell Rep. Author manuscript; Available in PMC 2020 Apr 30. (PMC7192526; doi:10.1016/j.celrep.2020.02.086), 2020-03-02
Supplement: NIHMS1578465-supplement-1.pdf [file NIHMS1578465-supplement-1.pdf]

Cell Reports, Volume 30

## Supplemental Information

### Structures of G $\alpha$ Proteins in Complex

with Their Chaperone Reveal

### Quality Control Mechanisms

Alpay Burak Seven, Daniel Hilger, Makaía M. Papasergi-Scott, Li Zhang, Qianhui Qu, Brian K. Kobilka, Gregory G. Tall, and Georgios Skiniotis

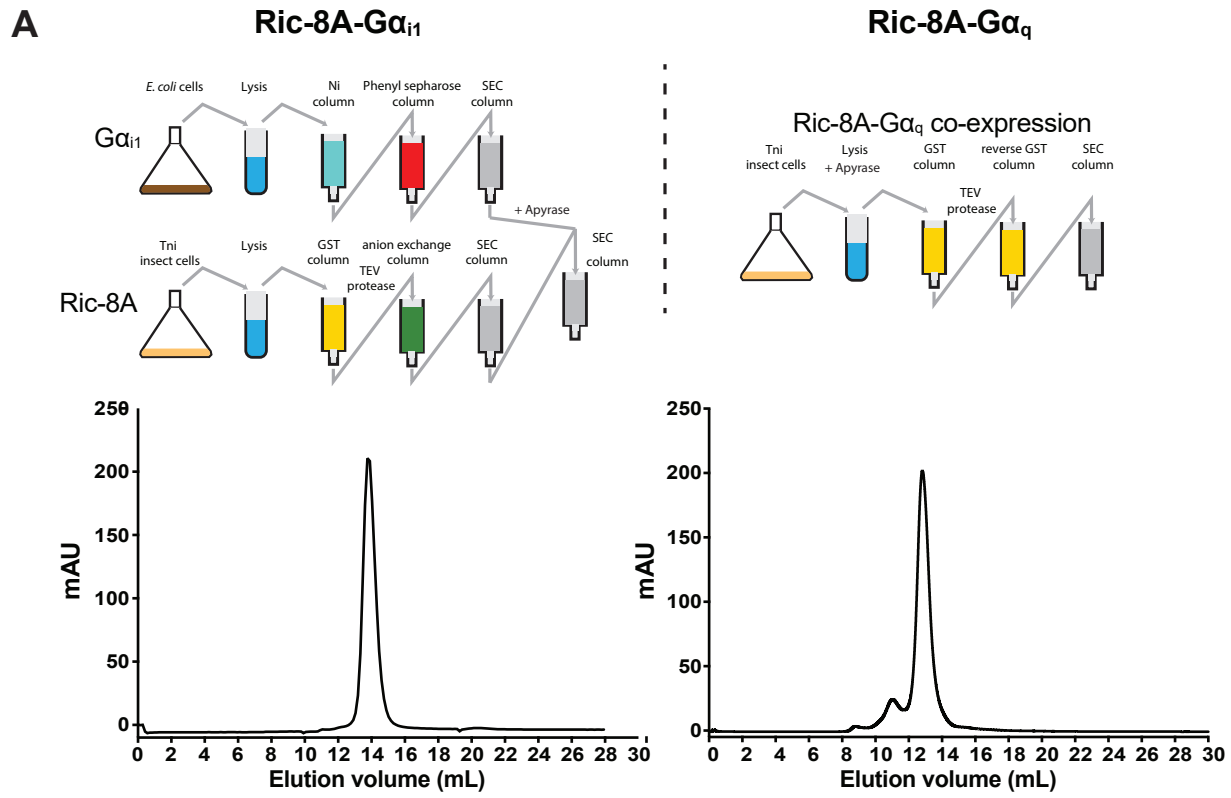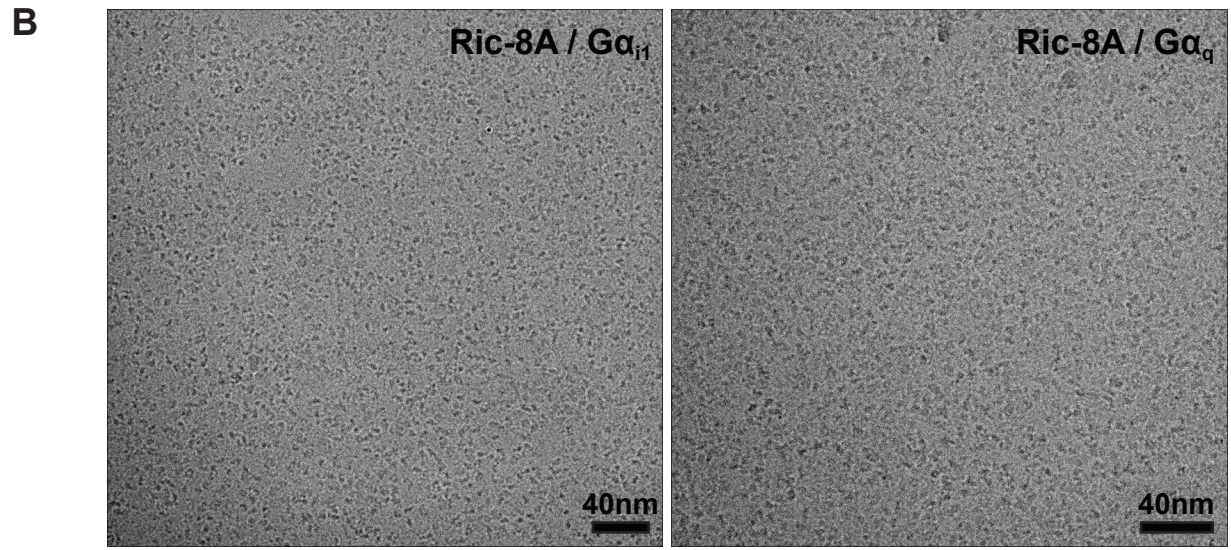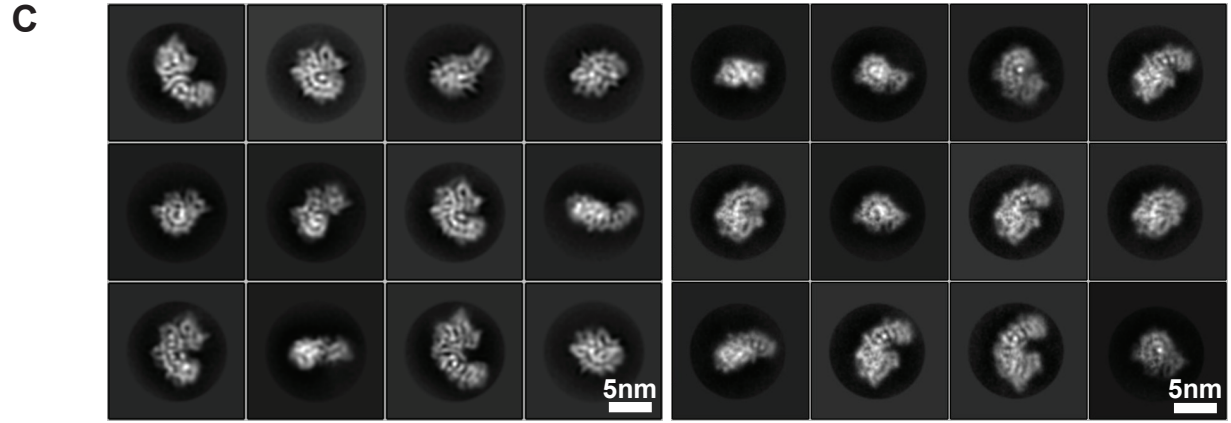

**Supplementary Figure 1.** Overview of protein purification strategies and cryoEM imaging. (A) Representative elution profile of purified Ric-8A-Gα<sub>i1</sub> and Ric-8A-Gα<sub>q</sub> complexes on Superdex200 Increase 10/300 size-exclusion column. (B) Representative cryoEM micrographs and (C) 2D class averages of full-length Ric-8A bound to full-length Gα<sub>i1</sub> (left panels) and Gα<sub>q</sub> (right panels) for ~200,000 total particle projections with each class representing between 500 to 2500 particle projections. Related to Figure 1.



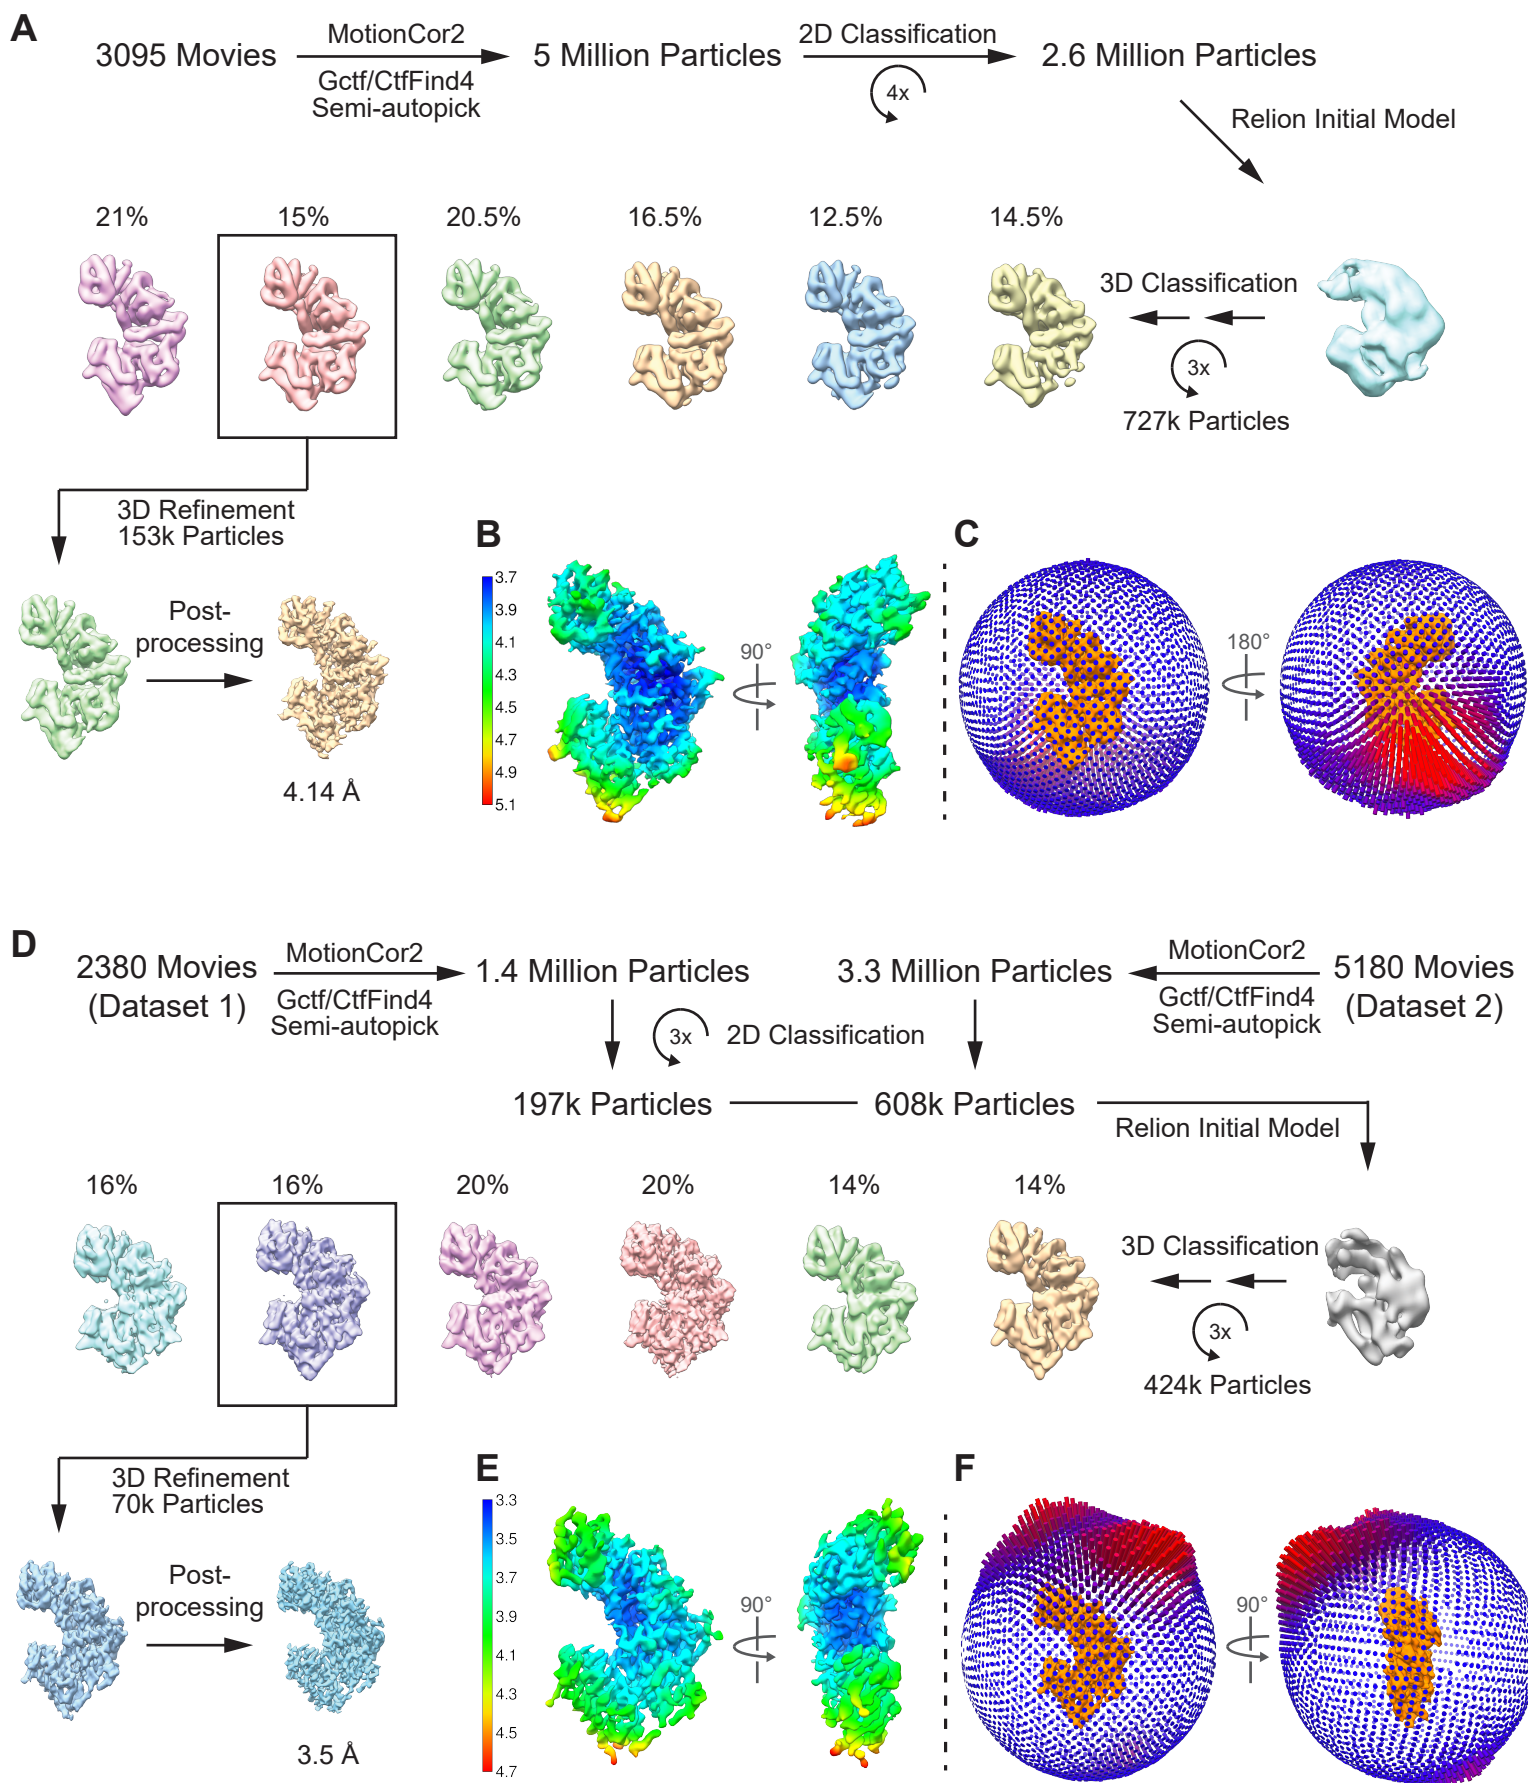

**Supplementary Figure 2.** CryoEM workflow for the Ric-8A-G $\alpha$  complexes. (A) CryoEM processing flow-chart, (B) local resolution estimation and (C) angular distribution of the projections contributing to the refined cryoEM map of the Ric-8A-G $\alpha_{i1}$  complex. (D) CryoEM processing flow-chart, (E) local resolution estimation and (F) angular distribution of the projections contributing to the refined cryoEM map of the Ric-8A-G $\alpha_q$  complex. Related to Figure 1.

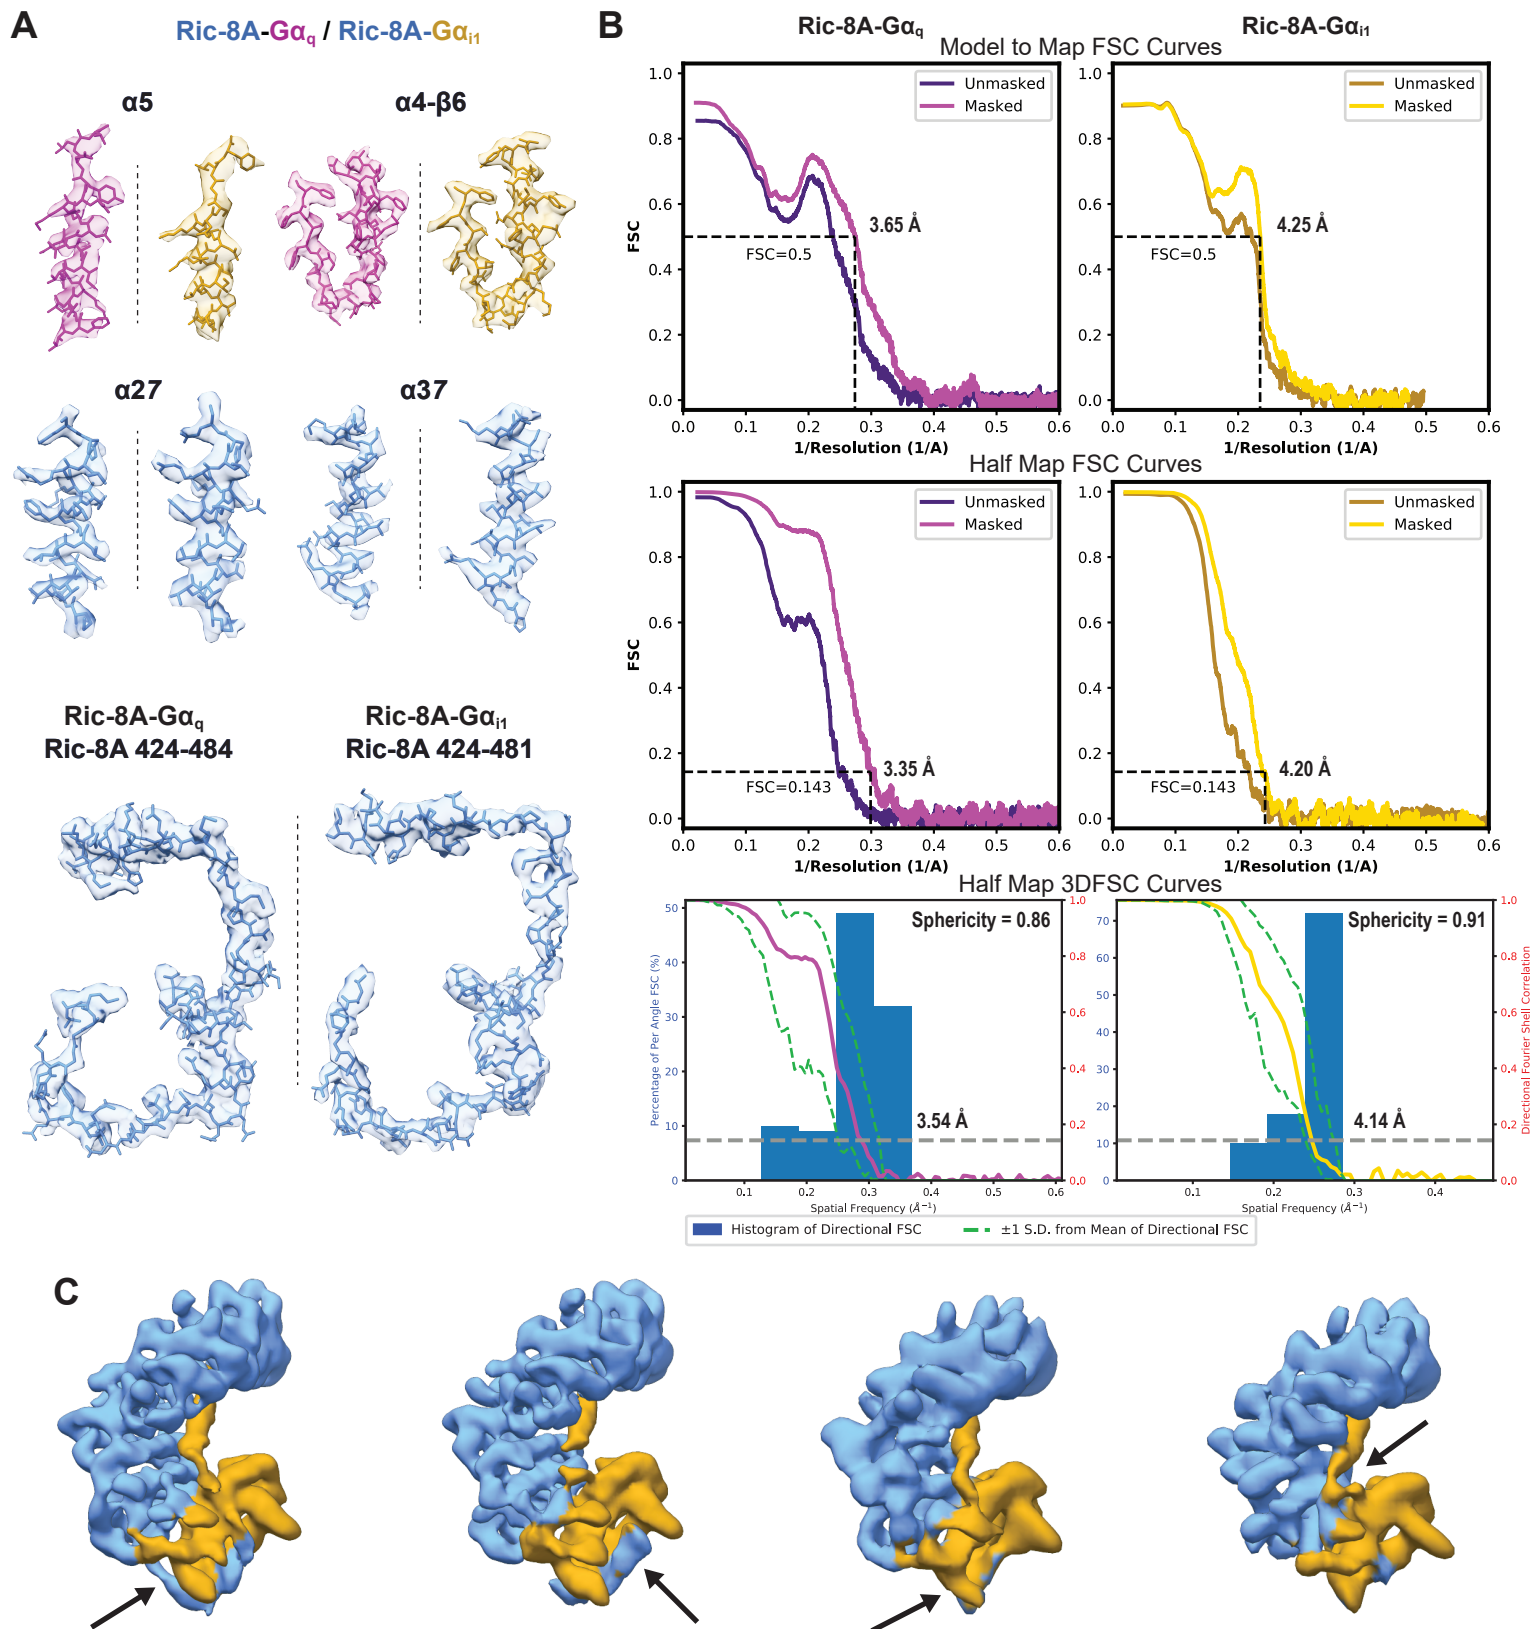

**Supplementary Figure 3.** CryoEM map quality and validation. (A) Representative cryoEM densities of  $G\alpha_q$  (magenta) and  $G\alpha_{i1}$  (gold) bound to Ric-8A (blue - left panels for  $G\alpha_q$  and right panels for  $G\alpha_{i1}$ ). (B) Fourier shell correlation plots between the model and full map and between the half maps generated using Mtriage in PHENIX and 3DFSC. Dashed lines represent the resolution values at 0.143 FSC for half maps and 0.5 FSC for the model to full map. (D) Structural variability in Ric-8A- $G\alpha$  complexes. Ric-8A- $G\alpha_{i1}$  particles were subjected to iterative 3D classification rounds followed by refinement to elucidate variation across reconstructions. Corresponding Ric-8A and  $G\alpha_{i1}$  densities are colored blue and gold respectively. Four representative classes are shown to highlight the structural variability (indicated by arrows) of the extended C-terminal loop region of Ric-8A, the C-terminal helix of Ric-8A interacting with the switch2 motif of  $G\alpha_{i1}$ , the Ras-like domain secondary structure elements that interact with guanine nucleotide and the AHD, and the loop between  $\alpha 5$  and  $\beta 6$  of  $G\alpha_{i1}$  including the TCAT motif respectively. Related to Figure 1.





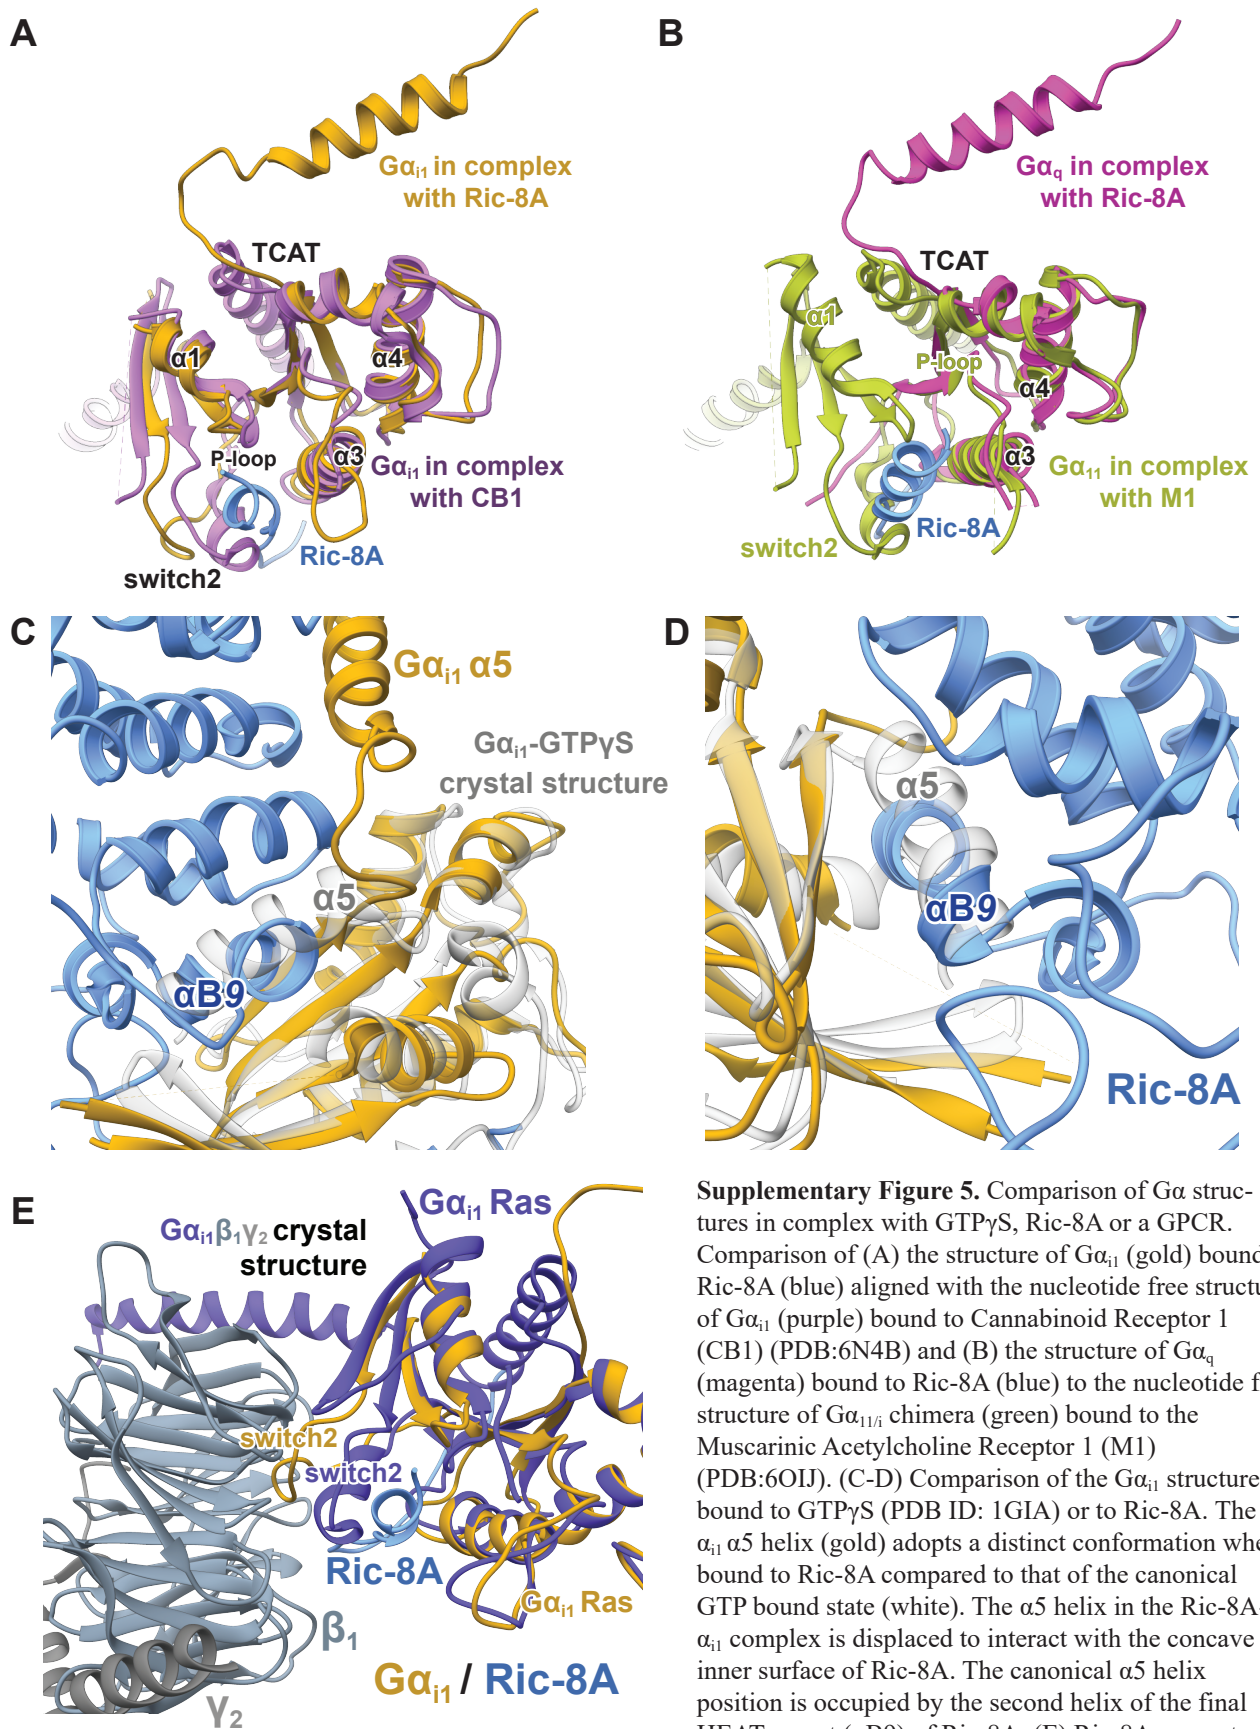

**Supplementary Figure 5.** Comparison of  $G\alpha$  structures in complex with GTP $\gamma$ S, Ric-8A or a GPCR. Comparison of (A) the structure of  $G\alpha_{i1}$  (gold) bound to Ric-8A (blue) aligned with the nucleotide free structure of  $G\alpha_{i1}$  (purple) bound to Cannabinoid Receptor 1 (CB1) (PDB:6N4B) and (B) the structure of  $G\alpha_q$  (magenta) bound to Ric-8A (blue) to the nucleotide free structure of  $G\alpha_{i1/i}$  chimera (green) bound to the Muscarinic Acetylcholine Receptor 1 (M1) (PDB:6OIJ). (C-D) Comparison of the  $G\alpha_{i1}$  structure bound to GTP $\gamma$ S (PDB ID: 1GIA) or to Ric-8A. The  $G\alpha_{i1}$   $\alpha 5$  helix (gold) adopts a distinct conformation when bound to Ric-8A compared to that of the canonical GTP bound state (white). The  $\alpha 5$  helix in the Ric-8A- $G\alpha_{i1}$  complex is displaced to interact with the concave inner surface of Ric-8A. The canonical  $\alpha 5$  helix position is occupied by the second helix of the final HEAT repeat ( $\alpha B9$ ) of Ric-8A. (E) Ric-8A prevents

premature association of  $G_{\beta\gamma}$  with  $G_{\alpha}$  by interacting with the switch2 motif. Overlay of the  $G\alpha_{i1}\beta_1\gamma_2$  crystal structure (PDB ID:1GP2) with the cryoEM model of  $G\alpha_{i1}$  (gold) bound to Ric-8A (blue). The switch2 motif interacts with Ric-8A in both  $G\alpha_{i1}$  and  $G\alpha_q$ . The switch2 motif of  $G\alpha_{i1}$  bound to Ric-8A adopts a different conformation than switch2 motif in either  $G\alpha_{i1}$  in complex with  $\beta_1\gamma_2$  (slate grey/grey) or  $G\alpha_{i1}$  alone. The conformation of  $G\alpha$  switch2 in Ric-8A- $G\alpha$  structures does not appear to be compatible with canonical  $\beta_1\gamma_2$  interaction. Related to Figure 3.



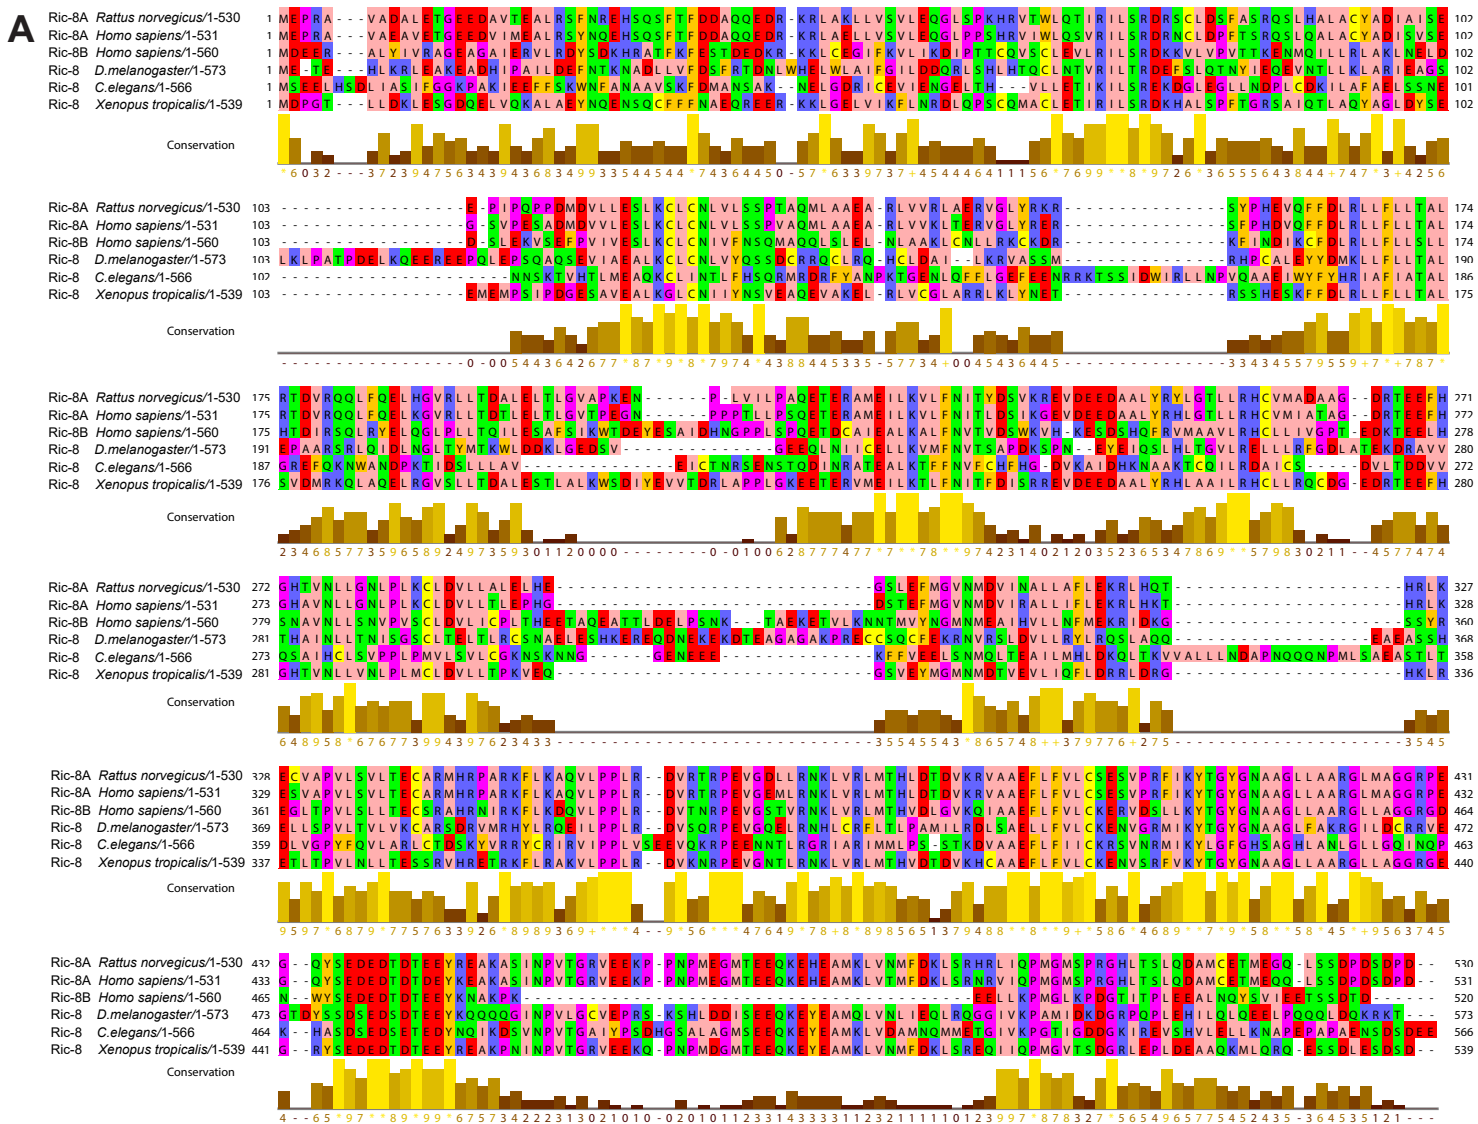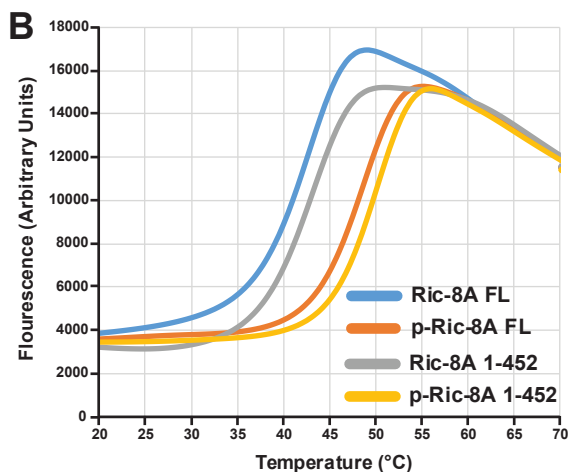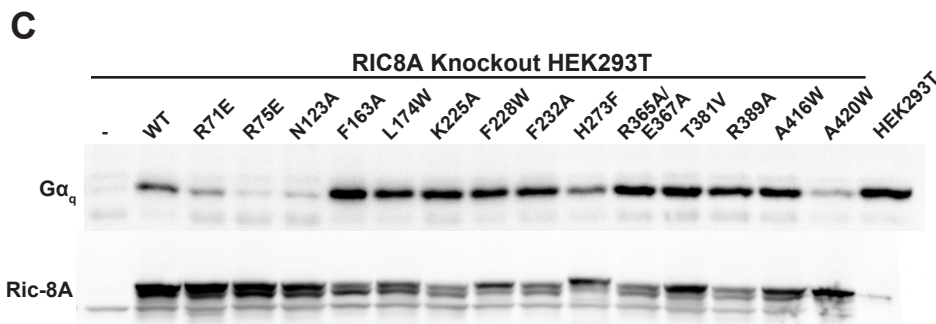

**Supplementary Figure 6.** Multiple sequence alignment of Ric-8, thermal stability of Ric-8A and expression control of Ric-8A mutants in the cell based Ric-8A complementation assay. (A) The sequence alignment of Ric-8 includes Ric-8A *Rattus norvegicus* (NP\_001093990.1), Ric-8A *Homo sapiens*, (NP\_001273063.1), Ric-8B *Homo sapiens* (NP\_001317074.1), Ric-8 *Drosophila melanogaster* (NP\_001285048.1), Ric-8 *Caenorhabditis elegans* (NP\_001023561.1) and RIC-8 *Xenopus tropicalis* (NP\_989159.1). (B) Thermal stability of full-length Ric-8A (Ric-8A FL), phosphorylated/full-length Ric-8A (p-Ric-8A FL) and truncated Ric-8A (Ric-8A 1-452), and phosphorylated/truncated Ric-8A (p-Ric-8A 1-452). The stability was analyzed using SYPRO Orange fluorescence over increasing temperatures. (C) Knockout of RIC-8A in HEK293T cells results in a Gα<sub>q</sub> abundance defect (Papasergi-Scott et al., 2018). The rescue of Gα<sub>q</sub> abundance upon stable expression of Ric-8A mutants was analyzed by quantitative immunoblotting of cell membrane samples. Representative western blot of membrane-bound Gα<sub>q</sub> is shown in upper panel and Ric-8A in lower panel. Related to Figure 4 and 6.

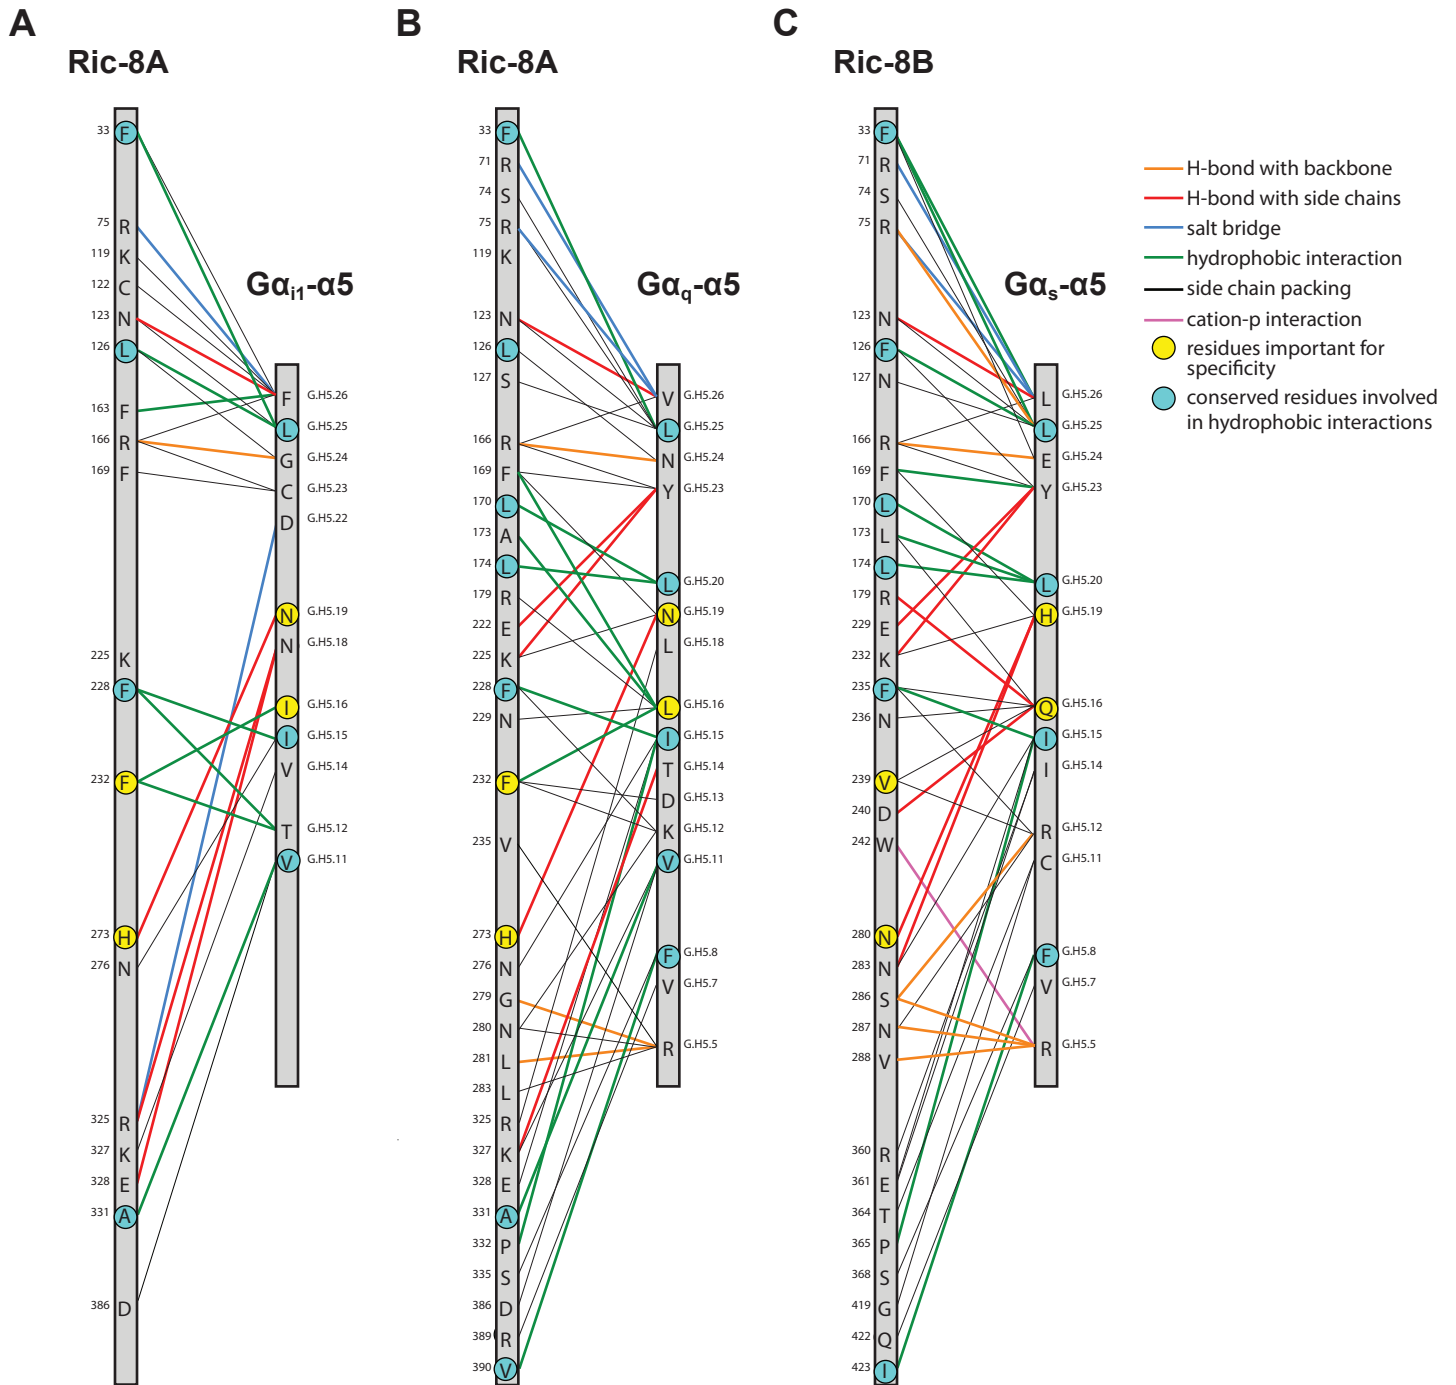

**Supplementary Figure 7.** Comparison of interaction profiles of the  $\alpha 5$  helices with the Ric-8 core domain. Interaction profile of the  $\alpha 5$  helix of (A)  $G\alpha_{i1}$  or (B)  $G\alpha_q$  with Ric-8A identified in the cryoEM structures, and the  $\alpha 5$  helix of  $G\alpha_s$  with Ric-8B predicted by homology modeling. Residue numbering is based on the “common  $G\alpha$  numbering (CGN) system in superscript” (Flock et al., 2015). Related to Figure 5.

**Table S1.** CryoEM data collection, refinement and validation statistics. Related to Figure 1.

| <b><u>Data collection and processing</u></b>        | <b>Ric-8A-G<math>\alpha_q</math></b> | <b>Ric-8A-G<math>\alpha_{i1}</math></b> |
|-----------------------------------------------------|--------------------------------------|-----------------------------------------|
| Magnification                                       | 165,000                              | 130,000                                 |
| Voltage (kV)                                        | 300                                  | 300                                     |
| Electron exposure (e <sup>-</sup> /Å <sup>2</sup> ) | 62                                   | 65                                      |
| Defocus range (μm)                                  | 1.0-2.0                              | 1.0-2.0                                 |
| Pixel size (Å)                                      | 0.82                                 | 1.06                                    |
| Symmetry imposed                                    | C1                                   | C1                                      |
| No. Initial particle images                         | 4,723,551                            | 4,960,082                               |
| No. Final particle images                           | 70,439                               | 153,110                                 |
| Map resolution (Å)                                  | 3.5                                  | 4.0                                     |
| FSC threshold                                       | 0.143                                | 0.143                                   |
| Map resolution range (Å)                            | 3.2 – 4.2                            | 3.8-4.5                                 |
| Map sharpening <i>B</i> factor (Å <sup>2</sup> )    | -90                                  | -180                                    |
|                                                     |                                      |                                         |
| <b><u>Refinement</u></b>                            |                                      |                                         |
| Initial model used (PDB code)                       | 6NMG (Ric-8A)/3AH8 (G $\alpha_q$ )   | 6NMG (Ric-8A)/1GP2 (G $\alpha_{i1}$ )   |
| Supplied resolution (Å)                             | 3.5                                  | 4.0                                     |
| FSC threshold                                       | 0.5                                  | 0.5                                     |
| Model composition                                   |                                      |                                         |
| Chains                                              | 2                                    | 2                                       |
| Non-hydrogen atoms                                  | 4,657                                | 5249                                    |
| Protein residues                                    | 603                                  | 669                                     |
| <i>B</i> factors (Å <sup>2</sup> )                  | 71.51                                | 142.16                                  |
| R.m.s. deviations                                   |                                      |                                         |
| Bond lengths (Å)                                    | 0.006                                | 0.005                                   |
| Bond angles (°)                                     | 0.934                                | 1.023                                   |
| Validation                                          |                                      |                                         |
| MolProbity score                                    | 1.98                                 | 1.97                                    |
| Clashscore                                          | 8.28                                 | 7.78                                    |
| Poor rotamers (%)                                   | 0.00                                 | 0.00                                    |
| Ramachandran plot                                   |                                      |                                         |
| Favored (%)                                         | 90.53                                | 90.08                                   |
| Allowed (%)                                         | 9.47                                 | 9.92                                    |
| Disallowed (%)                                      | 0                                    | 0                                       |

**Table S2.** Oligonucleotides. Related to Key Resources Table.

| REAGENT or RESOURCE                                                                                               | SOURCE                | IDENTIFIER         |
|-------------------------------------------------------------------------------------------------------------------|-----------------------|--------------------|
| Oligonucleotides                                                                                                  |                       |                    |
| G $\alpha$ <sub>i1</sub> - $\Delta$ F354_Fw: 5'-AAAGATTGGTCTCTAAGC<br>TTCTGAGATCCGGCTGC-3'                        | Stanford Pan Facility | Custom synthesis   |
| G $\alpha$ <sub>i1</sub> - $\Delta$ F354_Rev: 5'-TCTCAGAAGCTTAGAGACCACA<br>ATCTTTTAGATTATTTTTATGATGACATCTGTTAC-3' | Stanford Pan Facility | Custom synthesis   |
| Quickchange PCR forward primer for R75E: 5'-<br>CCGAATCCTATCCGAAGACCGCAGCTGCC-3'                                  | IDT                   | Customer synthesis |
| Quickchange PCR reverse primer for R75E: 5'-<br>GGCAGCTGCGGTCTTCGGATAGGATTCGG-3'                                  | IDT                   | Customer synthesis |
| Quickchange PCR forward primer for N123A: 5'-<br>CAAATGCCTGTGTGCTCTTGTGCTCAGCAG-3'                                | IDT                   | Customer synthesis |
| Quickchange PCR reverse primer for N123A: 5'-<br>CTGCTGAGCACAAGAGCACACAGGCATTTG-3'                                | IDT                   | Customer synthesis |
| Quickchange PCR forward primer for F163A: 5'-<br>CGAAGTCCAGTTCGCTGACTTAAGGCTCC-3'                                 | IDT                   | Customer synthesis |
| Quickchange PCR reverse primer for F163A: 5'-<br>GGAGCCTTAAGTCAGCGAACTGGACTTCG-3'                                 | IDT                   | Customer synthesis |
| Quickchange PCR forward primer for L174W: 5'-<br>CCTGCTAACAGCCTGGCGCACTGATGTGC-3'                                 | IDT                   | Customer synthesis |
| Quickchange PCR reverse primer for L174W: 5'-<br>GCACATCAGTGCGCCAGGCTGTTAGCAGG-3'                                 | IDT                   | Customer synthesis |
| Quickchange PCR forward primer for K225A: 5'-<br>CATGGAAATCCTCGCAGTGCTCTTTAACATC-3'                               | IDT                   | Customer synthesis |
| Quickchange PCR reverse primer for K225A: 5'-<br>GATGTTAAAGAGCACTGCGAGGATTTCCATG -3'                              | IDT                   | Customer synthesis |
| Quickchange PCR forward primer for F228W: 5'-<br>CCTCAAAGTGCTCTGGAACATCACCTACG-3'                                 | IDT                   | Customer synthesis |
| Quickchange PCR reverse primer for F228W: 5'-<br>CGTAGGTGATGTTCCAGAGCACTTTGAGG -3'                                | IDT                   | Customer synthesis |
| Quickchange PCR forward primer for F232A: 5'-<br>CTTTAACATCACCGCGACTCTGTAAAGAG-3'                                 | IDT                   | Customer synthesis |
| Quickchange PCR reverse primer for F232A: 5'-<br>CTCTTAACAGAGTCGGCGGTGATGTAAAG -3'                                | IDT                   | Customer synthesis |
| Quickchange PCR forward primer for H273F: 5'-<br>GGAGTTCATGGCTTCACCGTGAATCTCC-3'                                  | IDT                   | Customer synthesis |
| Quickchange PCR reverse primer for H273F: 5'-<br>GGAGATTCACGGTGAAGCCATGGAACTCC -3'                                | IDT                   | Customer synthesis |
| Quickchange PCR forward primer for R365A+E367A: 5'-<br>GGGATGTGAGGACTGCGCCTGCGGTGGGGGACCT<br>GCTC-3'              | IDT                   | Customer synthesis |
| Quickchange PCR reverse primer for R365A+E367A: 5'-<br>GAGCAGGTCCCCACCGCAGGCGCAGTCCTCACAT<br>CCC -3'              | IDT                   | Customer synthesis |
| Quickchange PCR forward primer for T381V: 5'-<br>CTTGTCGCCTCATGGTACACCTGGATACAG-3'                                | IDT                   | Customer synthesis |
| Quickchange PCR reverse primer for T381V: 5'-<br>CTGTATCCAGGTGTACCATGAGGCGGACAAG -3'                              | IDT                   | Customer synthesis |
| Quickchange PCR forward primer for R389A: 5'-<br>GATACAGATGTGAAGGCAGTAGCTGCTGAGTTC-3'                             | IDT                   | Customer synthesis |
| Quickchange PCR reverse primer for R389A: 5'-<br>GAACTCAGCAGCTACTGCCTTCACATCTGTATC -3'                            | IDT                   | Customer synthesis |



|                                                                                  |     |                    |
|----------------------------------------------------------------------------------|-----|--------------------|
| Quickchange PCR forward primer for A416W: 5'-CTACGGGAATGCTTGGGGCCTCCTGGCTG-3'    | IDT | Customer synthesis |
| Quickchange PCR reverse primer for A416W: 5'-CAGCCAGGAGGCCCAAGCATTCCCGTAG -3'    | IDT | Customer synthesis |
| Quickchange PCR forward primer for A420W: 5'-CTGCTGGCCTCCTGTGGGCCAGGGCCTCATG -3' | IDT | Customer synthesis |
| Quickchange PCR reverse primer for A420W: 5'-CATGAGGCCCTGGCCACAGGAGGCCAGCAG -3'  | IDT | Customer synthesis |
